# Supplementary material for: Networks of as-dispersed, polymer-wrapped (6,5) single-walled carbon nanotubes for selective Cu2+ and glyphosate sensing
Source: Royal Society of Chemistry journal article supplement (doi:10.1039/d2nr02517e), 2022-01-01
Supplement: d2nr02517e1.pdf [file d2nr02517e1.pdf]

# Supplementary Information

## **Networks of As-Dispersed, Polymer-Wrapped (6,5) Single-Walled Carbon Nanotubes for Selective Cu<sup>2+</sup> and Glyphosate Sensing**

*Merve Balci Leinen, Sebastian Lindenthal, Daniel Heimfarth and Jana Zaumseil\**

Institute for Physical Chemistry, Universität Heidelberg, D-69120 Heidelberg, Germany

**Corresponding Author**

\*zaumseil@uni-heidelberg.de

## Spectroscopic characterisation of polymer-sorted CoMoCat dispersions

The optical properties of the selective dispersions of CoMoCat SWNTs with the wrapping polymers PFO-BPy and PFO were investigated by collecting photoluminescence excitation-emission (PLE) maps and absorbance spectra. Out of all chiralities in the CoMoCat raw material, PFO-BPy disperses almost exclusively (6,5) SWNTs. In contrast to that, PFO yields a (7,5) SWNT enriched dispersion, with small amounts of (7,6) and (6,5) SWNTs.

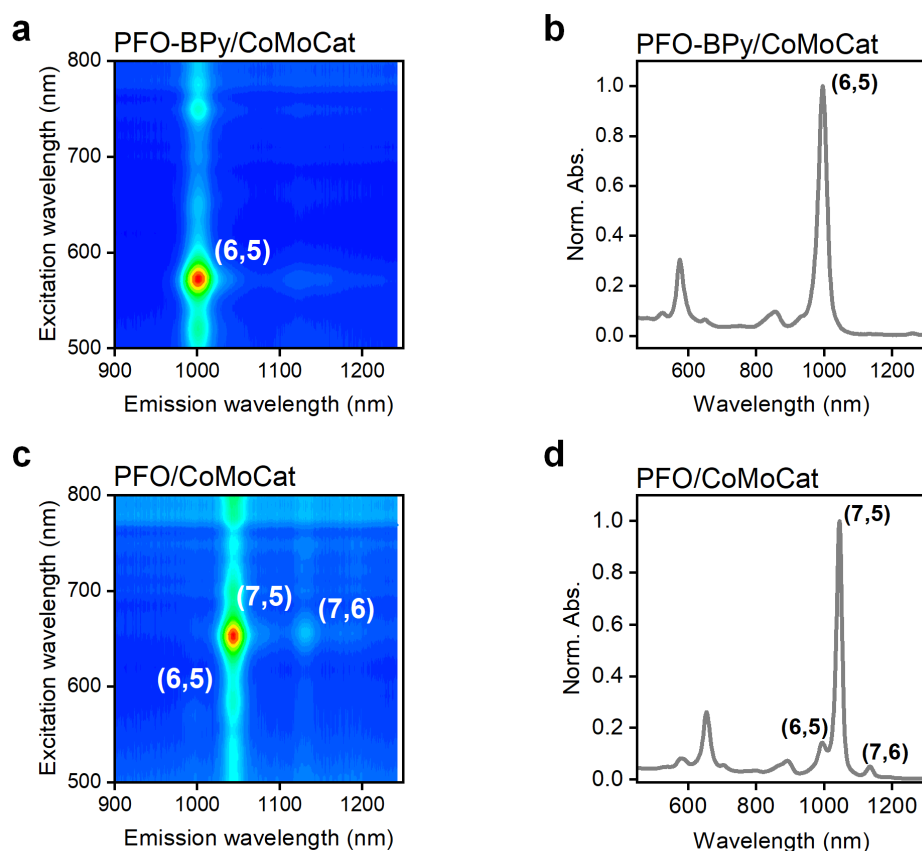

**Figure S1.** PLE maps and absorbance spectra of PFO-BPy/CoMoCat (**a,b**) and PFO/CoMoCat (**c,d**) dispersions in toluene. The absorption peaks at 575 nm and 650 nm correspond to the  $E_{22}$  transitions of the (6,5) and (7,5) SWNTs, respectively.

## Conditioning of transistors with PFO-BPy/CoMoCat SWNT network

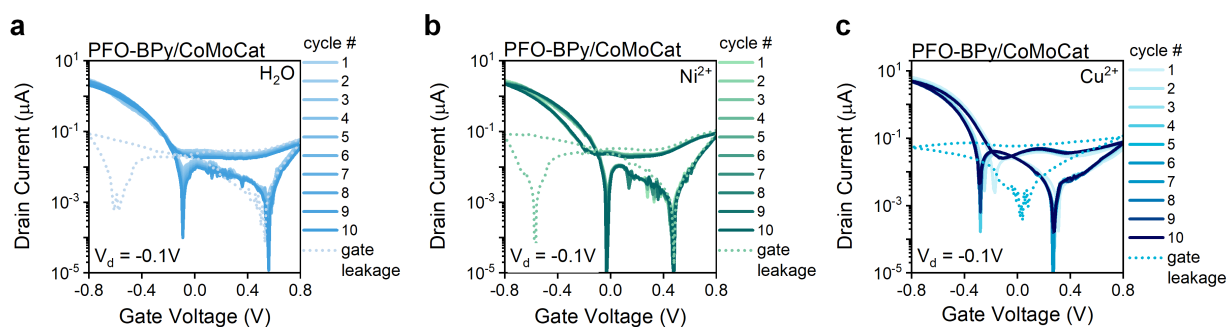

**Figure S2.** Conditioning of PFO-BPy/CoMoCat SWNT network-based, water-gated transistors (ten consecutive cycles of transfer characteristics, sweep rate  $\sim 50\text{ mV/sec}$ , total measurement time  $\sim 13\text{ min}$ ) with (a) de-ionized water, (b)  $15\text{ }\mu\text{M Ni}^{2+}$  aqueous solution, (c)  $15\text{ }\mu\text{M Cu}^{2+}$  aqueous solution as electrolyte.

## Conditioning of transistors with PFO/CoMoCat SWNT network

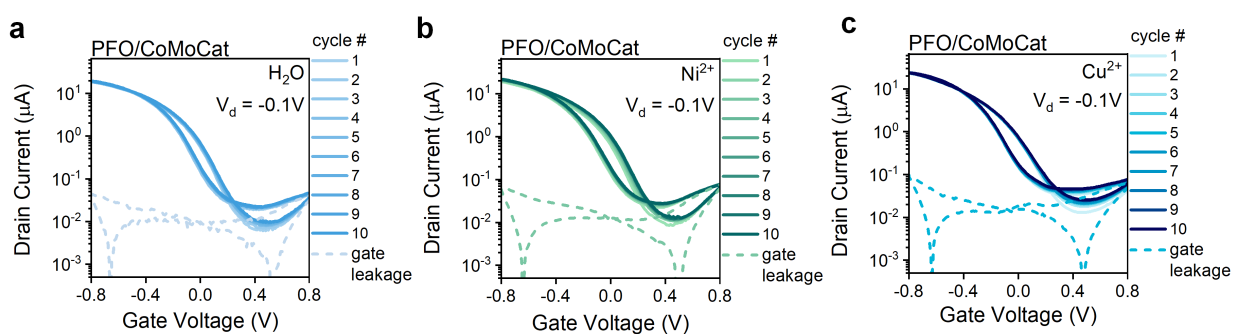

**Figure S3.** Conditioning of a reference transistor based on a PFO/CoMoCat SWNT network (ten consecutive cycles of transfer characteristics, sweep rate  $\sim 50\text{ mV/sec}$ , total measurement time  $\sim 13\text{ min}$ ) with (a) de-ionized water, (b)  $15\text{ }\mu\text{M Ni}^{2+}$  aqueous solution, (c)  $15\text{ }\mu\text{M Cu}^{2+}$  aqueous solution as electrolyte.

## Pyrophosphate sensing

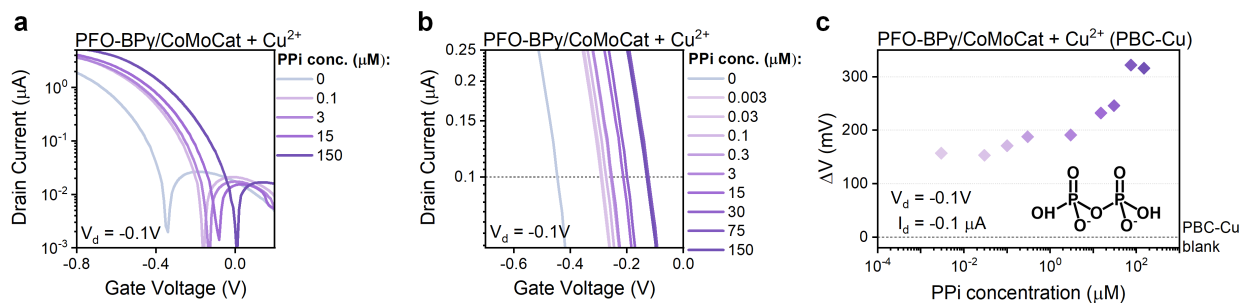

**Figure S4.** (a) Transfer characteristics of a water-gated transistor with a  $\text{Cu}^{2+}$ -treated PFO-BPy/CoMoCat SWNT network recorded at various pyrophosphate (PPI) concentrations in DI water. (b) Zoomed-in view of the transfer curves showing a shift to more positive gate voltages with increasing pyrophosphate concentration. (c) Correlation of the gate voltage shift ( $\Delta V$ ) versus blank (PBC-Cu blank) with increasing PPI concentration at a fixed drain current of  $-0.1\text{ }\mu\text{A}$  (inset: molecular structure of PPI).
